# Supplementary material for: Procalcitonin to Distinguish Viral From Bacterial Pneumonia: A Systematic Review and Meta-analysis
Source: Oxford University Press journal article supplement (doi:10.1093/cid/ciz545), 2019-06-25
Supplement: ciz545_suppl_supplementary_table_1.docx [file ciz545_suppl_supplementary_table_1.docx]

**Supplemental Table 1:** QUADAS-2 Interpretations

|  | Risk of Bias | | | | Applicability Concerns | | |
| --- | --- | --- | --- | --- | --- | --- | --- |
| Study | Patient Selection | Index Test | Reference Standard | Flow and Timing | Patient Selection | Index Test | Reference Standard |
| Masia | Low risk | Low risk | Low risk | Low risk | Low risk | Low risk | Low risk |
| Hirakata | Low risk | Low risk | Low risk | Low risk | Low risk | Low risk | Low risk |
| Ingram | High risk | Low risk | Low risk | Low risk | High risk | Low risk | Low risk |
| Daubin | Low risk | Low risk | Low risk | Low risk | High risk | Low risk | Low risk |
| Cuquemelle | Low risk | Low risk | Low risk | Low risk | High risk | Low risk | Low risk |
| Ahn | High risk | Low risk | Low risk | Low risk | High risk | Low risk | Low risk |
| Song | Low risk | Low risk | Low risk | Low risk | High risk | Low risk | Low risk |
| Kasamatsu | High risk | Low risk | Low risk | Low risk | Low risk | Low risk | Low risk |
| Menedez | Low risk | Low risk | Low risk | Low risk | Low risk | Low risk | Low risk |
| Musher | Low risk | Low risk | Low risk | Low risk | Low risk | Low risk | Low risk |
| Rodriquez | Low risk | Low risk | Low risk | Low risk | High risk | Low risk | Low risk |
| Self | Low risk | Low risk | Low risk | Low risk | Low risk | Low risk | Low risk |
